# Supplementary material for: AZD9291 Resistance Reversal Activity of a pH‐Sensitive Nanocarrier Dual‐Loaded with Chloroquine and FGFR1 Inhibitor in NSCLC
Source: PubMed Central journal article supplement (PMC7816715; doi:10.1002/advs.202002922), 2020-12-04
Supplement: ADVS-8-2002922-s001.pdf [file ADVS-8-2002922-s001.pdf]

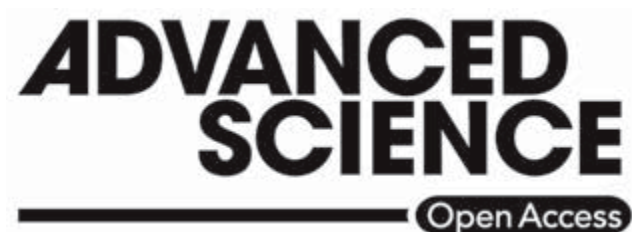

## Supporting Information

for *Adv. Sci.*, DOI: 10.1002/advs.202002922

**AZD9291 Resistance Reversal Activity of a pH-sensitive nanocarrier dual-loaded with chloroquine and FGFR1 inhibitor in NSCLC**

*Yu Gu, Songtao Lai, Yang Dong, Hao Fu, Liwei Song, Tianxiang Chen\*, Yourong Duan\*, Zhen Zhang\**

## Supporting Information

### **AZD9291 Resistance Reversal Activity of a pH-sensitive nanocarrier dual-loaded with chloroquine and FGFR1 inhibitor in NSCLC**

*Yu Gu, Songtao Lai, Yang Dong, Hao Fu, Liwei Song, Tianxiang Chen\*, Yourong Duan\*, Zhen Zhang\**

## Supporting Information

**AZD9291 Resistance Reversal Activity of a pH-sensitive nanocarrier dual-loaded with chloroquine and FGFR1 inhibitor in NSCLC**

Yu Gu, Songtao Lai, Yang Dong, Hao Fu, Liwei Song, Tianxiang Chen\*, Yourong Duan\*, Zhen Zhang\*

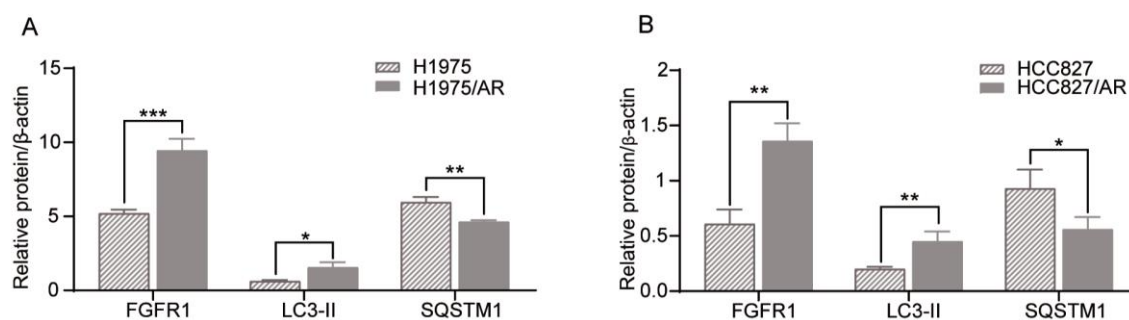

**Figure S1.** Quantitative grayscale intensity of protein expression in parental and AZD9291 resistant cells(H1975 and HCC827 cell lines). Values were normalized to  $\beta$ -actin protein levels. \* $P < 0.05$ , \*\* $P < 0.01$ , \*\*\* $P < 0.001$ .



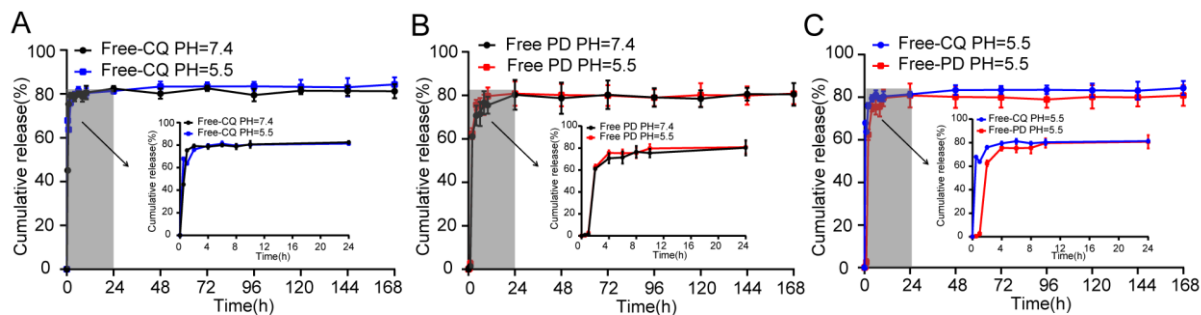

**Figure S4.** Release profile of free CQ(A) and free PD173074(B) in pH 5.5 and 7.4. CQ and PD173074 were released simultaneously from free CQ-PD in pH 5.5(C). Each data was expressed as mean $\pm$ standard deviation (n=3).

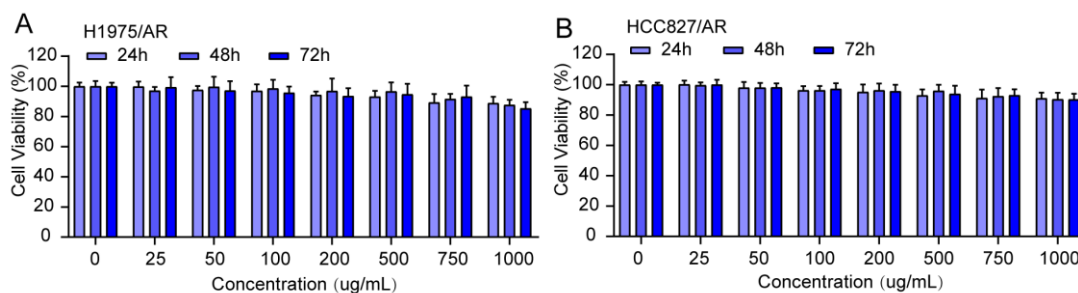

**Figure S5.** *In vitro* toxicity of cRGD-CaP NPs. Cell viability of H1975/AR(A) and HCC827/AR(B) treated with different concentrations of cRGD-CaP NPs in 72h.

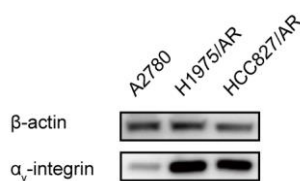

**Figure S6.** Western blot analysis showing the expression of integrin protein of different cell lines. Integrin  $\alpha_v$ -negative A2780 human ovarian tumor cells as a negative control.

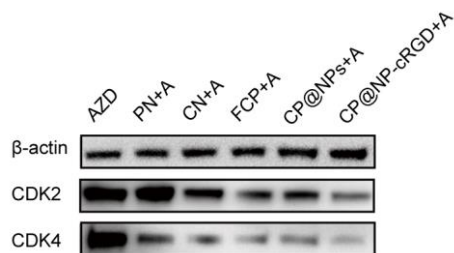

**Figure S7.** Western blot analysis showing the expression of cell cycle-associated proteins after different treatments.

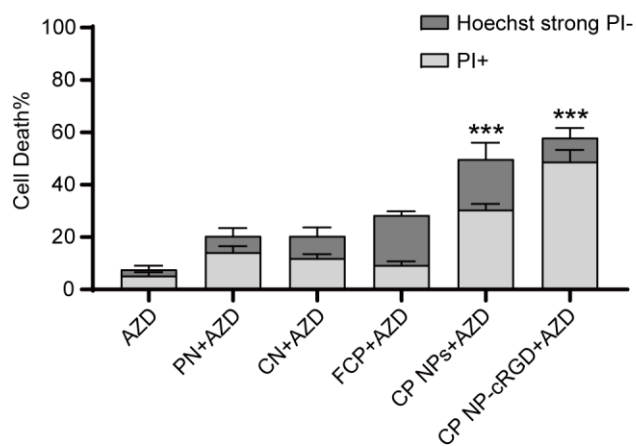

**Figure S8.** Quantification of cell death (apoptosis and necrosis) of different treatments in H1975/AR cells. All data are from five fields, \*\*\*p < 0.001, compared with AZD9291 alone group.

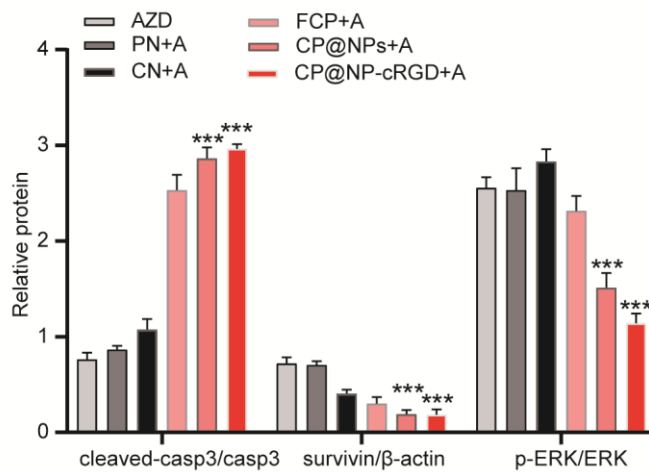

**Figure S9.** Quantitative grayscale intensity of protein expression of different treatments in H1975/AR cells. All data are from three repeats. Values are normalized to  $\beta$ -actin protein levels. \*\*\*P<0.001, compared with AZD9291 alone group.

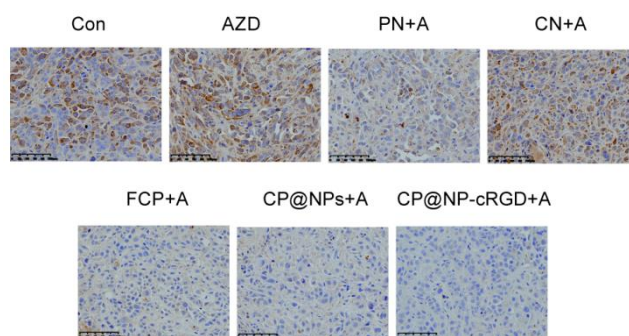

**Figure S10.** Immunohistochemistry results of proteins pFGFR1 with 200-fold magnification (At scale 100 $\mu$ m).
